# Supplementary material for: The Risk of Colorectal Polyps after Weight Loss Therapy Versus Obesity: A Propensity-Matched Nationwide Cohort Study
Source: MDPI journal article supplement (doi:10.3390/cancers15194820), 2023-09-30

**Table S1.** Demographics of eligible cohort prior to matching.

| Variable                                                       |              | Colonoscopy pre-BRS (n=11112) | Colonoscopy post-BRS (n=9555) | Colonoscopy pre-SO (n=117802) | Colonoscopy post-SO (n=142948) | p-value |
|----------------------------------------------------------------|--------------|-------------------------------|-------------------------------|-------------------------------|--------------------------------|---------|
| Age at time of colonoscopy                                     |              | 52 [48-57]                    | 52 [49-59]                    | 55 [51-60]                    | 56 [51-62]                     | <0.001  |
| Sex                                                            |              |                               |                               |                               |                                | <0.001  |
| Male                                                           |              | 2713 (24.4)                   | 2164 (22.7)                   | 47038 (39.9)                  | 55030 (38.5)                   |         |
| Female                                                         |              | 8399 (75.6)                   | 7391 (77.4)                   | 70764 (60.1)                  | 87918 (61.5)                   |         |
| Charlson comorbidity index                                     |              | 3 [2-4]                       | 2 [1-3]                       | 3 [2-4]                       | 2 [1-4]                        | <0.001  |
| Years from pre-BRS or pre-SO colonoscopy to index visit date*  | Median [IQR] | 0.8 [0.3-1.8]                 | n/a                           | 1.3 [0.5-2.4]                 | n/a                            | <0.001  |
|                                                                | Range        | 0.003-6.3                     | n/a                           | 0.003-6.5                     | n/a                            |         |
| Years from index visit date to post-BRS or post-SO colonoscopy | Median [IQR] | n/a                           | 2.7 [1.8-4.2]                 | n/a                           | 2.3 [1.6-3.6]                  | <0.001  |
|                                                                | Range        | n/a                           | 1.0-8.5                       | n/a                           | 1.0-8.7                        |         |
| Screening colonoscopy indication                               |              | 6170 (55.5)                   | 5803 (60.7)                   | 64868 (55.1)                  | 86012 (60.2)                   | <0.001  |
| Alcohol use                                                    |              | 133 (1.2)                     | 48 (0.5)                      | 1544 (1.3)                    | 1001 (0.7)                     | <0.001  |
| Tobacco use                                                    |              | 1751 (15.8)                   | 1026 (10.7)                   | 16009 (13.6)                  | 12244 (8.6)                    | <0.001  |

**Table S2:** Polyp rates in the pre-matching cohort

| All patients      |                               |                               |                               |                                |
|-------------------|-------------------------------|-------------------------------|-------------------------------|--------------------------------|
| Variable          | Colonoscopy pre-BRS (n=11112) | Colonoscopy post-BRS (n=9555) | Colonoscopy pre-SO (n=117802) | Colonoscopy post-SO (n=142948) |
| Colorectal polyps | 5250 (47.3)                   | 4389 (45.9)                   | 61067 (51.8)                  | 81382 (56.9)                   |
| Rectal polyps     | 1260 (11.3)                   | 753 (7.9)                     | 14258 (12.1)                  | 13264 (9.3)                    |
| Males             |                               |                               |                               |                                |
|                   | Colonoscopy pre-BRS (n=2713)  | Colonoscopy post-BRS (n=2164) | Colonoscopy pre-SO (n=47038)  | Colonoscopy post-SO (n=55030)  |
| Colorectal polyps | 1533 (56.5)                   | 1201 (55.5)                   | 28335 (60.2)                  | 35258 (64.1)                   |
| Rectal polyps     | 393 (14.5)                    | 215 (9.9)                     | 6744 (14.3)                   | 6083 (11.1)                    |
| Females           |                               |                               |                               |                                |
|                   | Colonoscopy pre-BRS (n=8399)  | Colonoscopy post-BRS (n=7391) | Colonoscopy pre-SO (n=70764)  | Colonoscopy post-SO (n=87918)  |
| Colorectal polyps | 3717 (44.3)                   | 3188 (43.1)                   | 32732 (46.3)                  | 46124 (52.5)                   |
| Rectal polyps     | 867 (10.3)                    | 538 (7.3)                     | 7514 (10.6)                   | 7181 (8.2)                     |

**Table S3:** The full pre-matched cohort. Comparison of colorectal/ rectal polyps' unadjusted odds ratios by sex pre- and post-BRS, pre- and post-SO

| Unadjusted OR (95% CI)<br>Post- vs. Pre- colonoscopy |           | Males            | Females          |
|------------------------------------------------------|-----------|------------------|------------------|
| Colorectal polyps                                    | BRS       | 0.96 (0.86-1.08) | 0.96 (0.90-1.02) |
|                                                      | SO        | 1.18 (1.15-1.21) | 1.28 (1.26-1.31) |
|                                                      | BRS vs SO | 0.82 (0.73-0.92) | 0.75 (0.70-0.80) |
| Rectal polyps                                        | BRS       | 0.65 (0.55-0.78) | 0.68 (0.61-0.76) |
|                                                      | SO        | 0.74 (0.72-0.77) | 0.75 (0.72-0.77) |
|                                                      | BRS vs SO | 0.88 (0.73-1.05) | 0.91 (0.81-1.02) |

**Table S4:** The full pre-matched cohort. Comparison of rectal polyp odds ratios by sex pre- and post-bariatric surgery, pre- and post-severe obesity in full cohort prior to matching

| Post- vs. Pre- colonoscopy |           | Males            | Females          |
|----------------------------|-----------|------------------|------------------|
| Adjusted* OR (95% CI)      | BRS       | 0.92 (0.77-1.11) | 1.00 (0.89-1.13) |
|                            | SO        | 1.08 (1.03-1.13) | 1.11 (1.06-1.15) |
|                            | BRS vs SO | 0.86 (0.71-1.03) | 0.91 (0.81-1.02) |

\*Models adjusted for age at colonoscopy, tobacco use, alcohol use, Charlson comorbidity index, screening colonoscopy, date of colonoscopy (before/after Oct. 1, 2015)

**Table S5:** The propensity-matched analysis. Comparison of colorectal/ rectal polyps' unadjusted odds ratios by sex pre- and post-BRS, pre- and post-SO

| Unadjusted OR (95% CI)<br>Post- vs. Pre- colonoscopy |           | Males            | Females          |
|------------------------------------------------------|-----------|------------------|------------------|
| Colorectal polyps                                    | BRS       | 0.80 (0.63-1.02) | 0.99 (0.87-1.13) |
|                                                      | SO        | 1.32 (1.03-1.70) | 1.26 (1.11-1.44) |
|                                                      | BRS vs SO | 0.61 (0.43-0.86) | 0.79 (0.66-0.94) |
| Rectal polyps                                        | BRS       | 0.67 (0.45-0.99) | 1.05 (0.83-1.34) |
|                                                      | SO        | 1.08 (0.73-1.61) | 0.85 (0.68-1.08) |
|                                                      | BRS vs SO | 0.62 (0.35-1.08) | 1.23 (0.88-1.73) |

BRS: Bariatric Surgery; SO: Severe Obesity

**Table S6:** The propensity-matched cohort. Rectal polyps' rates by group and sex - the propensity-matched analysis.

|                      | <b>Pre-BRS<br/>(n=2420)</b> | <b>Post-BRS<br/>(n=2420)</b> | <b>Pre-SO<br/>(n=2420)</b> | <b>Post-SO<br/>(n=2420)</b> |
|----------------------|-----------------------------|------------------------------|----------------------------|-----------------------------|
| <b>All patients</b>  |                             |                              |                            |                             |
| <b>Rectal polyps</b> | 8.5%                        | 7.9%                         | 8.9%                       | 8.2%                        |
| <b>Males</b>         |                             |                              |                            |                             |
| <b>Rectal polyps</b> | 12.5%                       | 8.7%                         | 10.0%                      | 10.8%                       |
| <b>Females</b>       |                             |                              |                            |                             |
| <b>Rectal polyps</b> | 7.4%                        | 7.7%                         | 8.6%                       | 7.5%                        |

BRS: Bariatric Surgery; SO: Severe Obesity

**Table S7:** The propensity-matched cohort. Diabetes at index visit date, defined as date of bariatric surgery. Diabetes medications' cessation or new usage at time of colonoscopy.

| <b>Variable</b>                                             | <b>BRS Males<br/>(n=530)</b> | <b>BRS Females<br/>(n=1890)</b> |
|-------------------------------------------------------------|------------------------------|---------------------------------|
| Diabetes at index                                           | 305 (57.5)                   | 775 (41.0)                      |
| Diabetes medications at index                               | 237 (44.7)                   | 568 (30.1)                      |
| Cessation of diabetes medications at post-index colonoscopy | 138/237 (58.2)               | 355/568 (62.5)                  |
| Began diabetes medication after index                       | 9/293 (3.1)                  | 44/1322 (3.3)                   |

Results are presented as count (percentage)

**Figure S1:** Flowchart of 1:1:1:1 propensity matching algorithm (LPS SD: Logit of propensity score standardized difference)

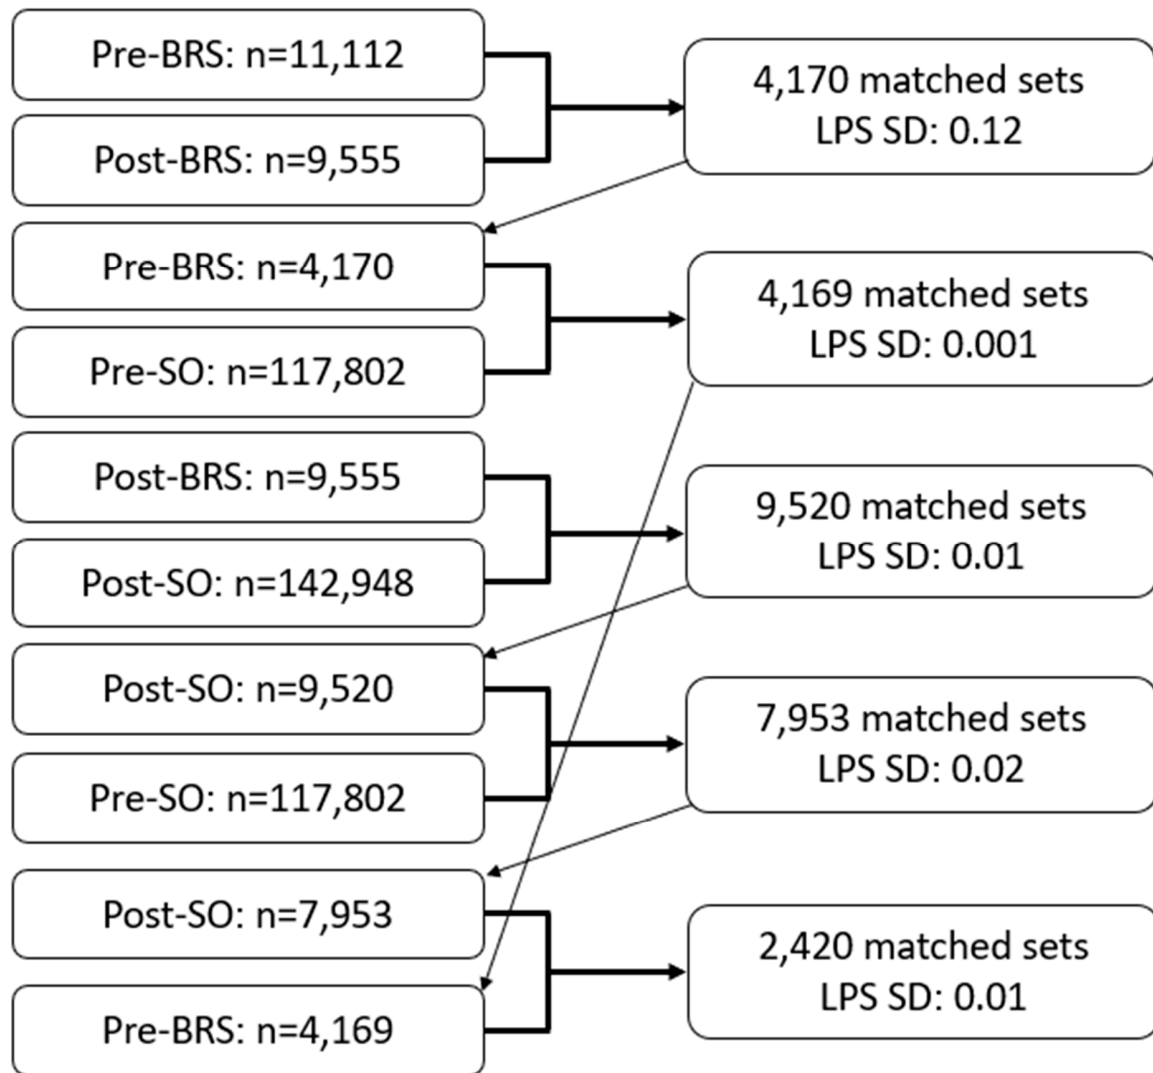

Supplement: s1 [file s1]
